# Supplementary material for: Rational design of a pyrene based luminescent porous supramolecular framework: excimer emission and energy transfer
Source: Royal Society of Chemistry journal article supplement (doi:10.1039/c5ra14267a), 2015-01-01
Supplement: c5ra14267a1.pdf [file c5ra14267a1.pdf]

## Supporting Information

### **Rational design of a pyrene based luminescent porous supramolecular framework: excimer emission and energy transfer**

Komal Prasad,<sup>a</sup> Ritesh Haldar,<sup>a</sup> and Tapas Kumar Maji<sup>ab\*</sup>

a Molecular Materials Lab, New Chemistry Unit, Jawaharlal Nehru Centre for Advanced Scientific Research, Jakkur, Bangalore- 560064, India.

b Chemistry and Physics of Materials Unit, Jawaharlal Nehru Centre for Advanced Scientific Research, Jakkur, Bangalore-560064, India.

\*E-mail: [tmaji@jncasr.ac.in](mailto:tmaji@jncasr.ac.in). Tel: (+91) 80 2208 2810; Fax: (+91) 80 2208 2766

**Table S1** Selected Bond Distances (Å) for **1**

|          |          |          |           |
|----------|----------|----------|-----------|
| Cd1-O1   | 2.321(4) | Cd1-O2   | 2.355(4)  |
| Cd1-O4   | 2.220(4) | C12-C13  | 1.435(11) |
| Cd1-O1_a | 2.321(4) | Cd1-O2_a | 2.355(4)  |
| Cd1-O4_a | 2.220(4) |          |           |

a= 2-x,y,1/2-z

**Table S2:** Selected bond angles (°) for **1**

|              |            |             |            |
|--------------|------------|-------------|------------|
| O1-Cd1-O2    | 55.59(13)  | O1-Cd1-O4   | 144.98(12) |
| O2-Cd1-O4_a  | 102.12(15) | O1-Cd1-O1_a | 84.61(14)  |
| O1-Cd1-O2_a  | 107.55(14) | O1-Cd1-O4_a | 97.47(15)  |
| O2-Cd1-O2_a  | 159.48(15) | O2-Cd1-O4   | 91.07(14)  |
| O1_a -Cd1-O4 | 97.47(15)  | O1_a-Cd1-O2 | 107.55(14) |
| O2_a-Cd1-O4  | 102.12(15) |             |            |

a= 2-x,y,1/2-z

**Table S3:** Selected bond distances (Å) for **2**

|          |          |          |          |
|----------|----------|----------|----------|
| Zn1-O1   | 1.973(3) | Zn1-O2   | 2.501(3) |
| Zn1-N1   | 2.093(3) | Zn1-O1_a | 1.973(3) |
| Zn1-O2_a | 2.501(3) | Zn1-N1_a | 2.093(3) |

a= -x,y,1/2-z

**Table S4:** Selected bond angles (°) for **2**

|               |            |               |            |
|---------------|------------|---------------|------------|
| O1-Zn1-O2     | 57.28(9)   | O1-Zn1-N1     | 103.94(10) |
| O1-Zn1-O1_a   | 138.08(11) | O1-Zn1-O2_a   | 97.63(10)  |
| O1-Zn1-N1_a   | 108.18(10) | O2-Zn1-N1     | 153.44(9)  |
| O1_a-Zn1-O2   | 97.63(10)  | O2-Zn1-O2_a   | 110.51(10) |
| O2-Zn1-N1_a   | 89.21(10)  | O1_a-Zn1-N1   | 108.18(10) |
| O2_a-Zn1-N1   | 89.21(10)  | N1-Zn1-N1_a   | 78.81(11)  |
| O1_a-Zn1-O2_a | 57.28(9)   | O1_a-Zn1-N1_a | 103.94(10) |
| O2_a-Zn1-N1_a | 153.44(9)  |               |            |

a= -x,y,1/2-z

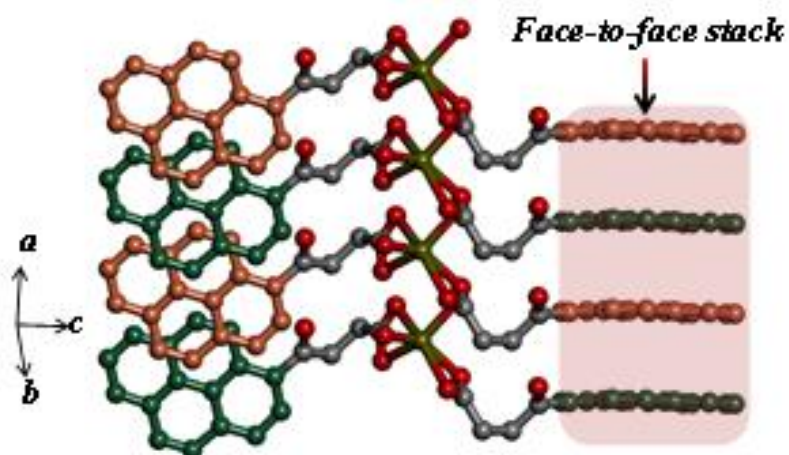

**Fig. S1** Off-set face-to-face stacking of molecular complex **1** forming 1D column like structure.

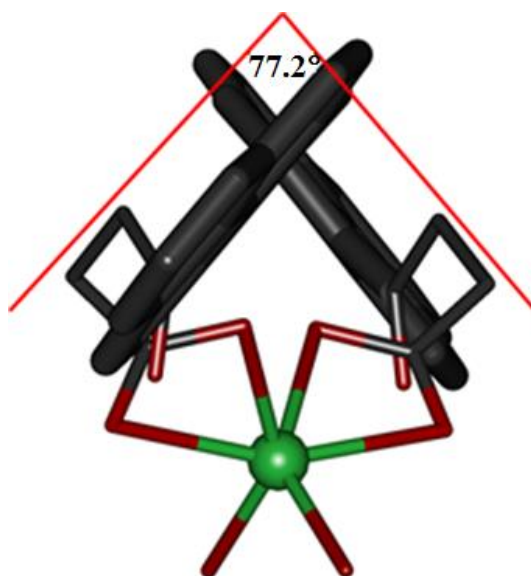

**Fig. S2** Dihedral angle between two pyrene rings in **1**.

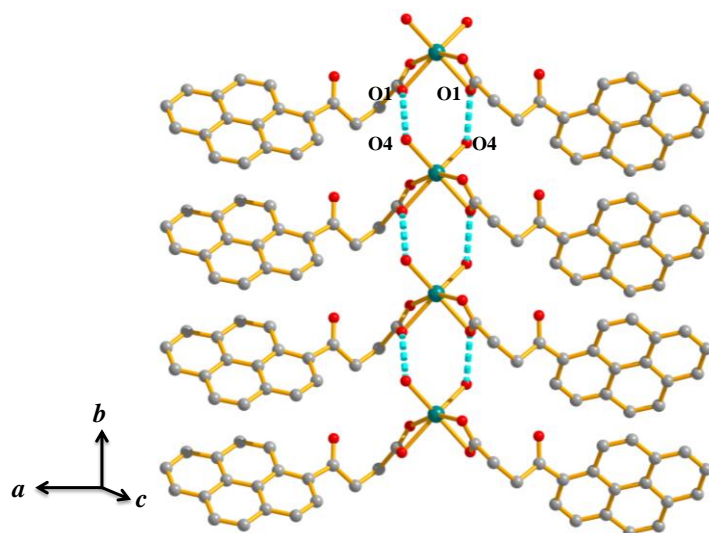

**Fig. S3** Hydrogen bonding (cyan dotted lines) between coordinated water molecules and carboxylate oxygens in **1**.

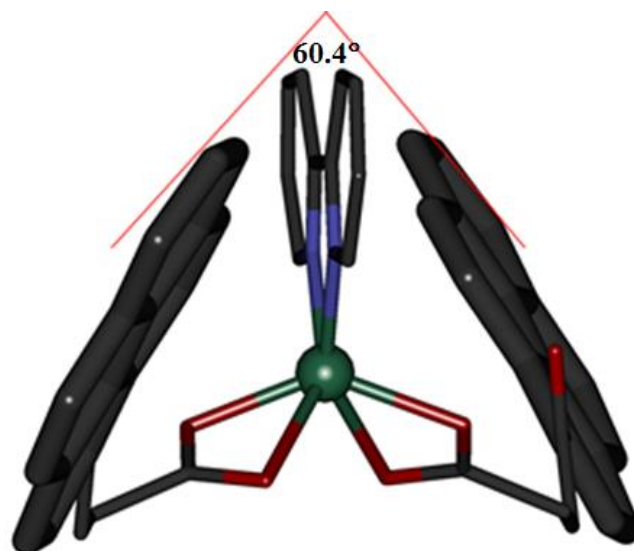

**Fig. S4** Dihedral angle between two pyrene rings in **2**.

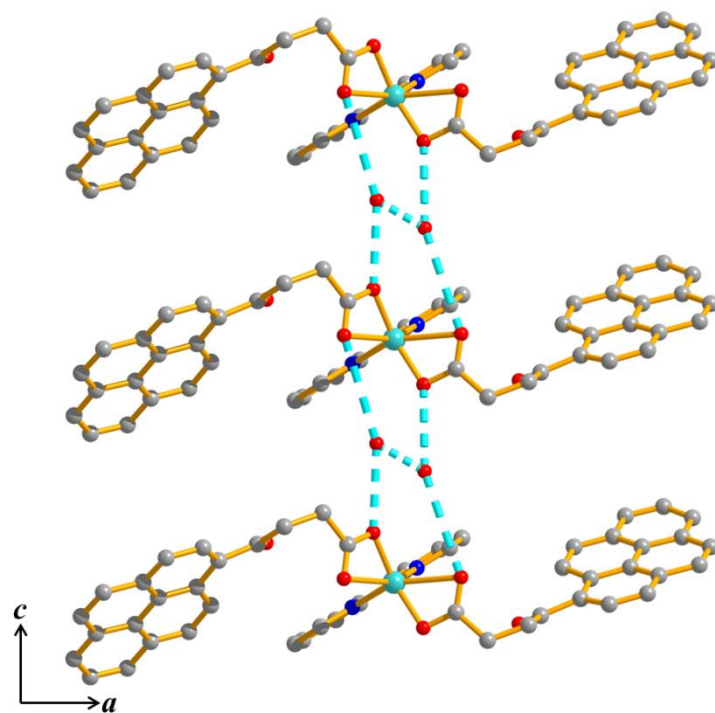

**Fig. S5** View of H-bonding interactions among guest water molecules and the carboxylate oxygens in **2**.

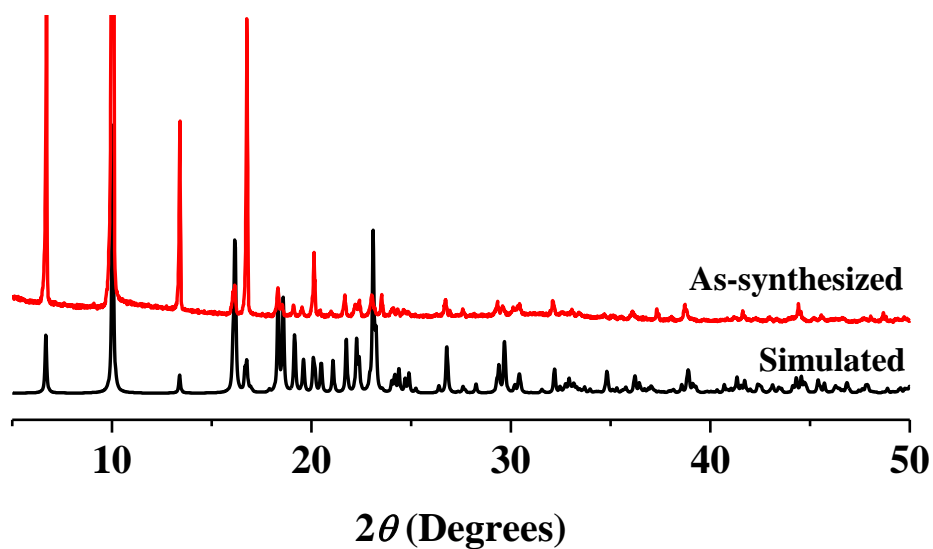

**Fig. S6** PXRD patterns of compound 1: simulated and as-synthesized.

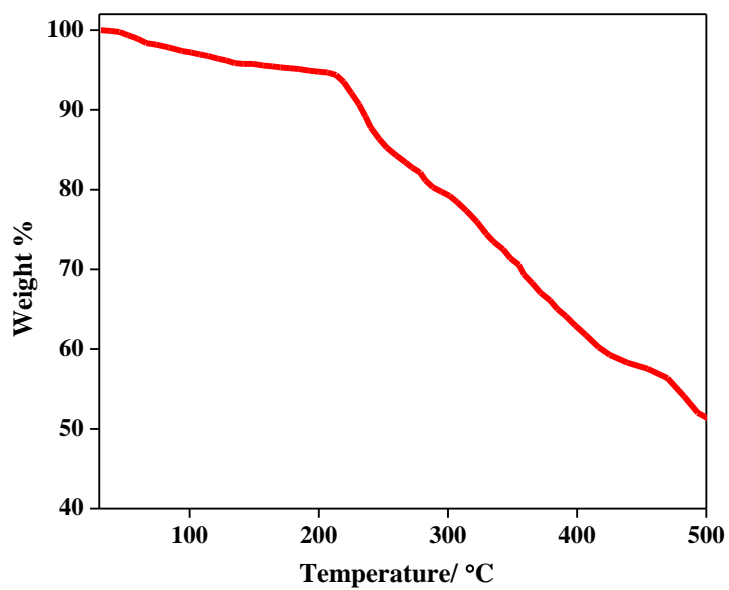

**Fig. S7** TG analysis for compound 2 in nitrogen atmosphere (flow rate = 50 mLmin<sup>-1</sup>) in the temperature range 30–600 °C (heating rate = 5 °C min<sup>-1</sup>).

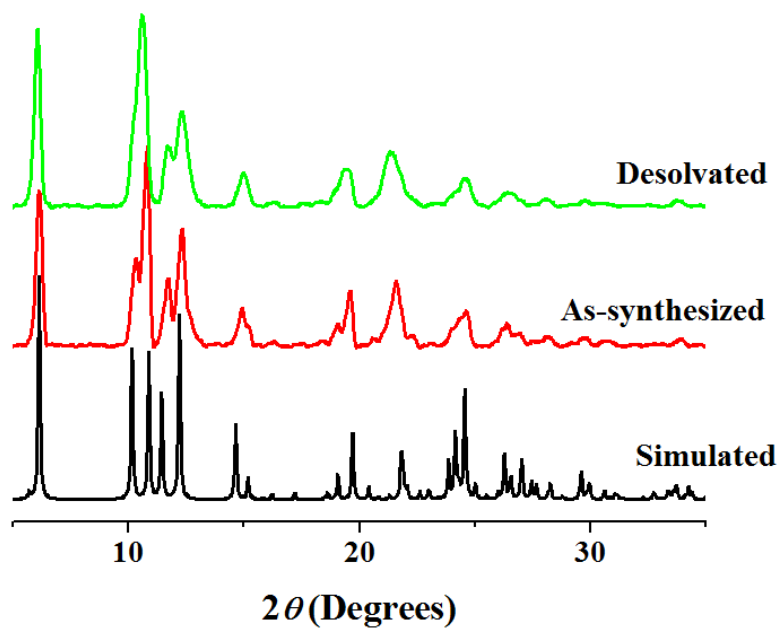

**Fig. S8** PXR D patterns of different phases of compound **2**: simulated, as-synthesized and desolvated.

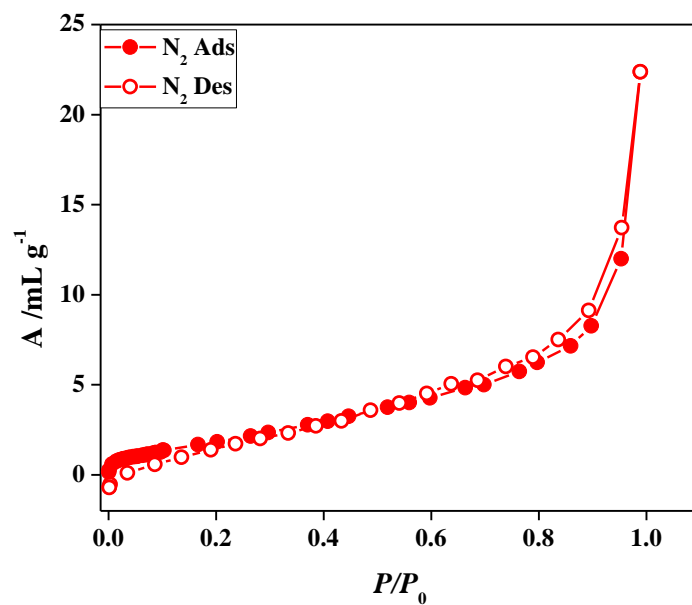

**Fig. S9**  $N_2$  adsorption isotherm of **2** at 77 K.

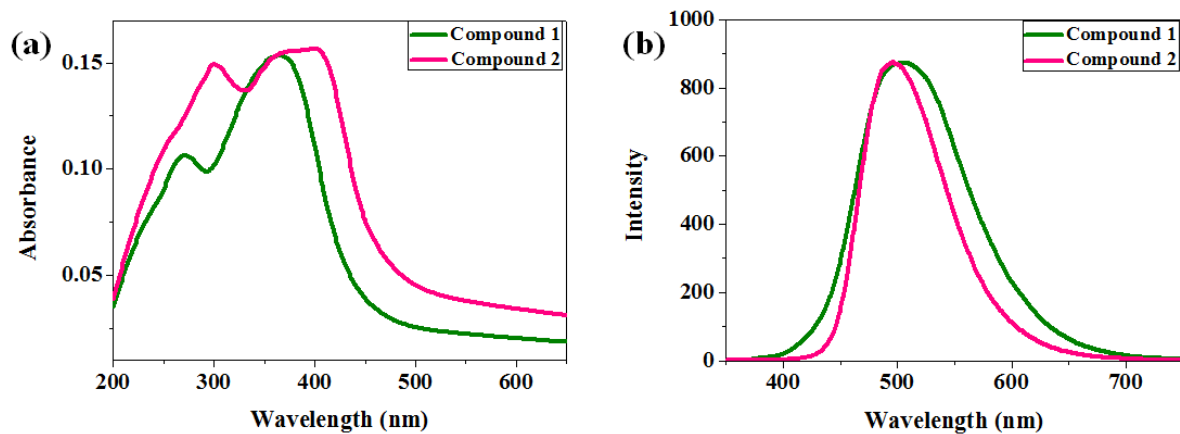

**Fig. S10** (a) UV-vis absorption spectra of **1** and **2** in solid state; (b) Emission spectra of **1** and **2** in solid state upon excitation at 330 nm.

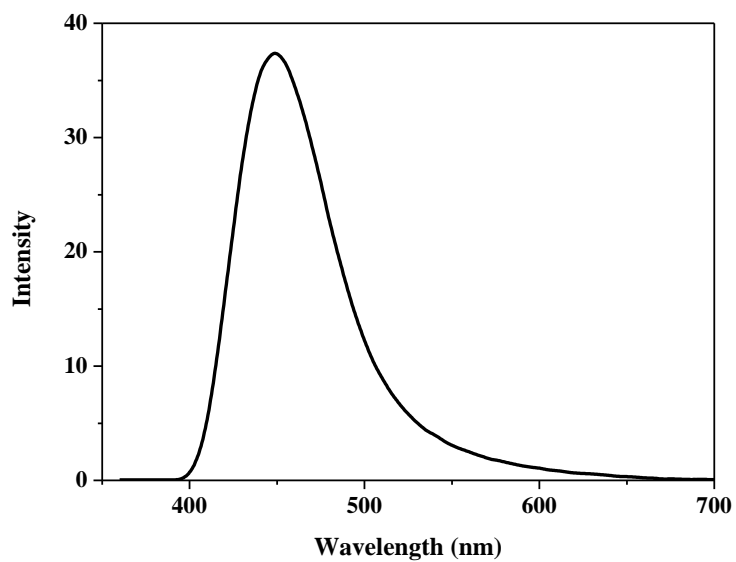

**Fig. S11** Emission spectrum of oxo-pba in methanol upon excitation at 330 nm.

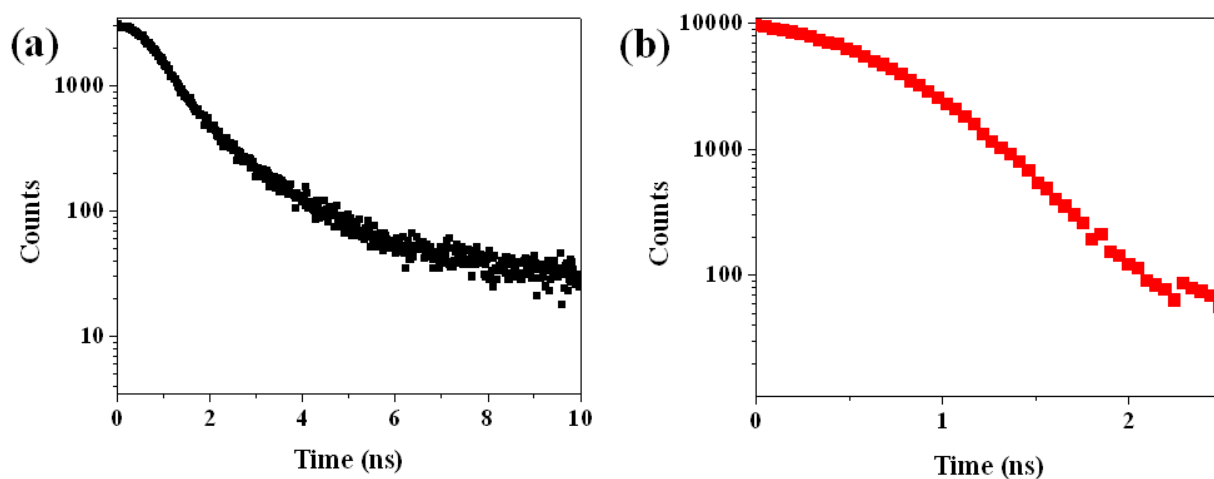

**Fig. S12** (a) Fluorescence life time spectrum of oxo-pba dissolved in methanol monitored at 442 nm upon excitation at 270 nm; (b) showing IRF (Instrument Response Function) upon excitation at 270 nm.

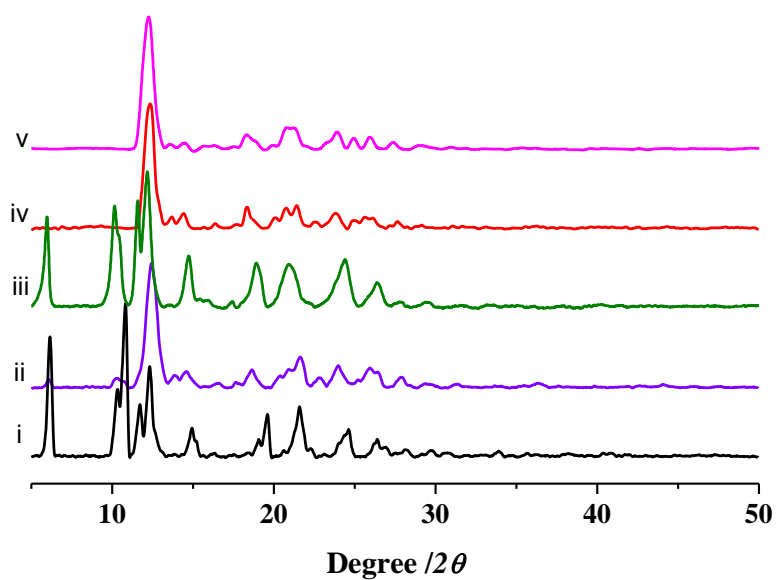

**Fig. S13** PXR D patterns of (i) desolvated **2**; (ii) methanol exchanged **2**; (iii) desolvated **2** (heated at 80 °C) after methanol exchange; (iv) AO@**2** with methanol; (v) AO@**2** heated at 60 °C.



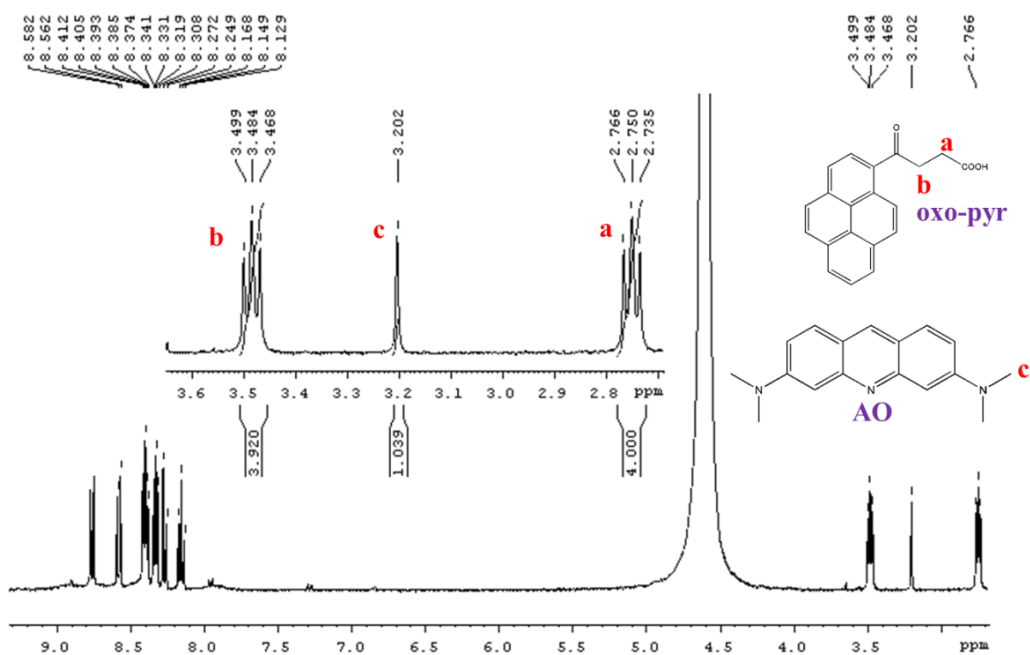

**Fig. S14**  $^1\text{H-NMR}$  spectrum of **AO@2** in DMSO after dissolution in DCl.

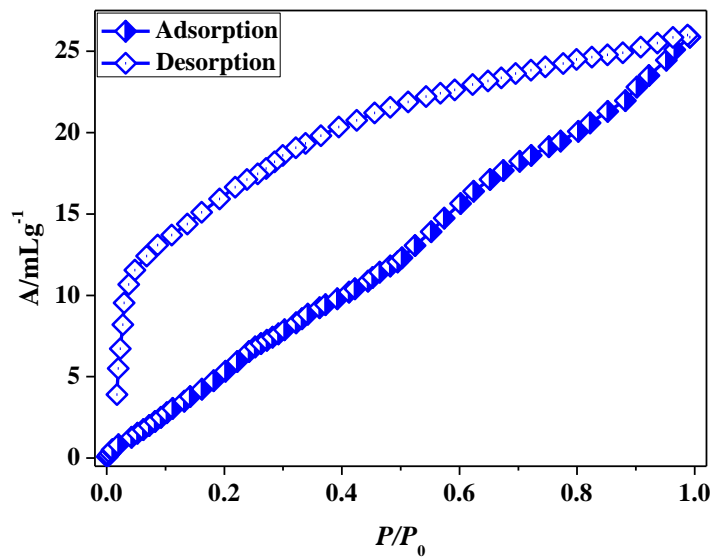

**Fig. S15**  $\text{CO}_2$  adsorption isotherm of physical mixture of **2** and AO at 195 K.

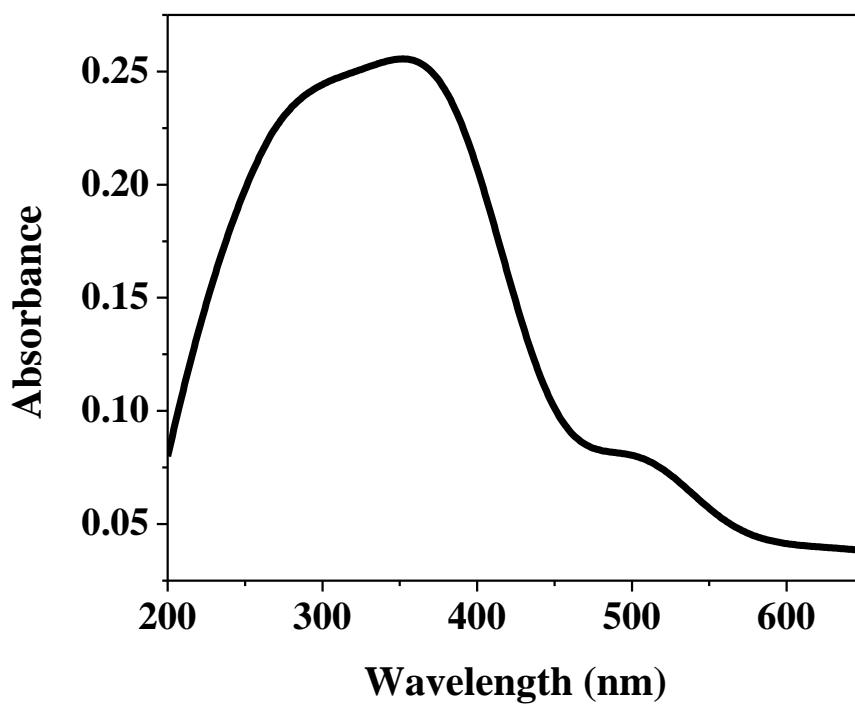

Fig. S16 UV-vis absorption spectrum of **AO@2** in solid state.

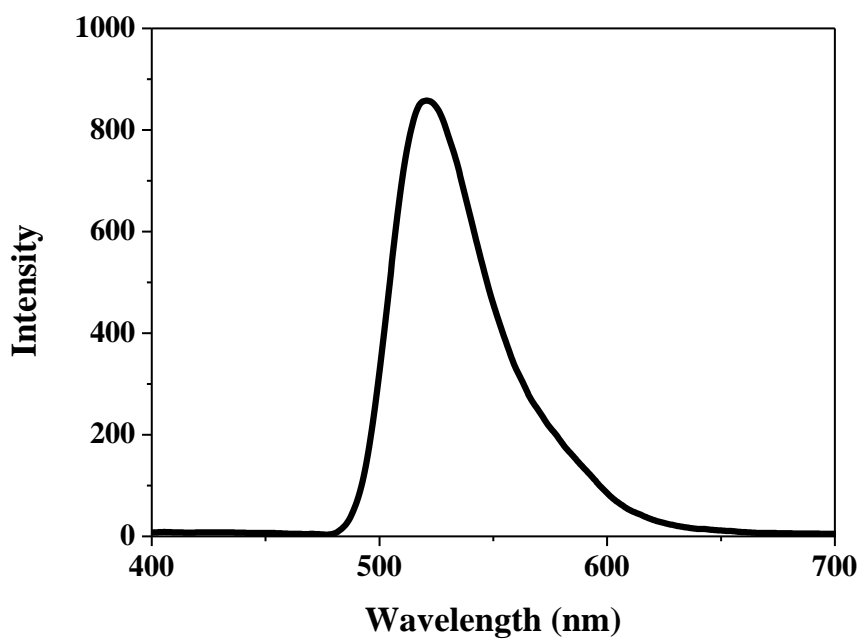

Fig. S17 Emission spectrum of acridine orange in methanol upon excitation at 300 nm.

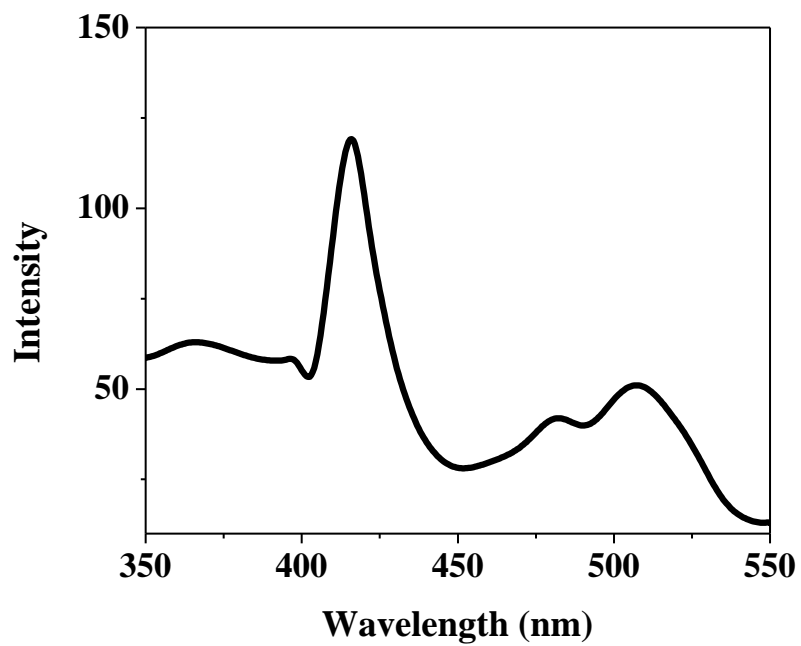

Fig. S18 Excitation spectrum of 2@AO observed at 575 nm.

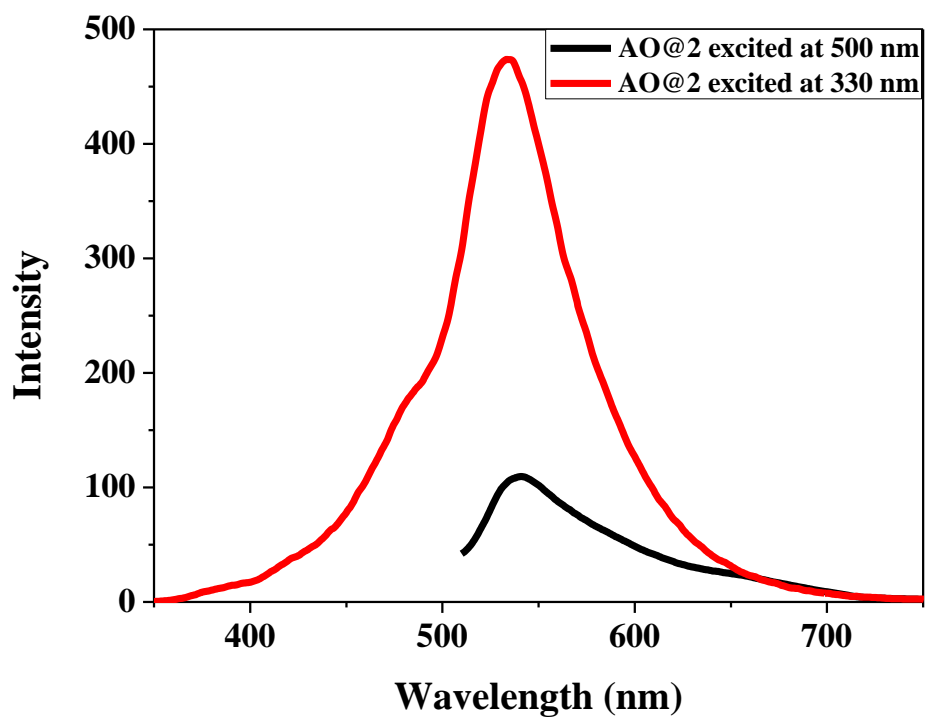

Fig. S19 Emission spectra of AO@2 upon excitation at 330 and 500 nm.

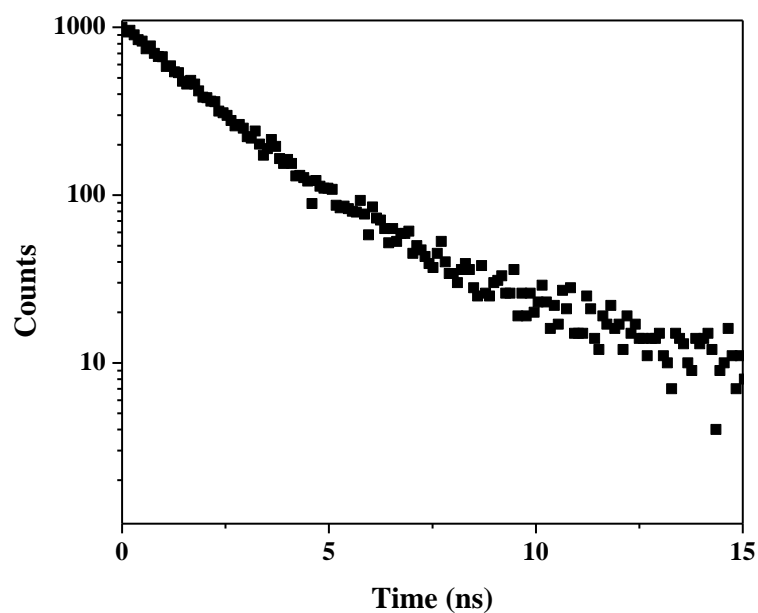

**Fig. S20** Fluorescence life time profiles of **AO@2** monitored at 600 nm upon excitation at 405 nm.

## Indexing Results of compound 2a

NUMBER OF SINGLE INDEXED LINES = 15

TOTAL NUMBER OF LINES = 17

$a = 15.018140$  (0.014754) Å  $\alpha = 90.000000$  .000000 °

$b = 13.149670$  (0.016752) Å  $\beta = 98.234620$  .083901 °

$c = 9.790491$  (0.028959) Å  $\gamma = 90.000000$  .000000 °

UNIT CELL VOLUME = 1913.53 Å<sup>3</sup>

| H | K | L | SST-OBS | SST-CALC | DELTA    | 2TH-OBS | 2TH-CALC | D-OBS   | FREE |
|---|---|---|---------|----------|----------|---------|----------|---------|------|
| 1 | 0 | 0 | .002670 | .002686  | -.000016 | 5.924   | 5.941    | 14.9073 | 0    |

1 0 0 .002670 .002686 -.000016 5.924 5.941 14.9073 0

|    |   |   |         |         |          |         |        |        |   |
|----|---|---|---------|---------|----------|---------|--------|--------|---|
| -1 | 0 | 1 | .007825 | .007826 | -.000001 | 10.150  | 10.150 | 8.7083 | 0 |
| 1  | 0 | 1 | .010194 | .010186 | .000008  | 11.590  | 11.585 | 7.6292 | 0 |
| -1 | 1 | 1 | .011244 | .011257 | -.000013 | 12.174  | 12.181 | 7.2643 | 0 |
| 1  | 1 | 1 | .013579 | .013618 | -.000039 | 13.383  | 13.403 | 6.6105 | 0 |
|    |   |   | 0       | 2       | 0        | .013726 |        | 13.456 |   |
| 1  | 2 | 0 | .016399 | .016412 | -.000013 | 14.715  | 14.721 | 6.0152 | 0 |
| -2 | 1 | 1 | .018160 | .018135 | .000025  | 15.489  | 15.479 | 5.7161 | 0 |
| 2  | 0 | 1 | .019285 | .019424 | -.000139 | 15.965  | 16.023 | 5.5469 | 0 |
| 2  | 1 | 1 | .023000 | .022855 | .000145  | 17.446  | 17.391 | 5.0792 | 0 |
| -3 | 0 | 1 | .026957 | .026952 | .000004  | 18.900  | 18.898 | 4.6917 | 0 |
| 2  | 2 | 1 | .033143 | .033150 | -.000007 | 20.979  | 20.981 | 4.2312 | 0 |
| -4 | 0 | 1 | .044570 | .044574 | -.000004 | 24.375  | 24.377 | 3.6487 | 0 |
|    |   |   | 4       | 1       | 1        | .057447 |        | 27.735 |   |
| 1  | 4 | 0 | .057707 | .057591 | .000117  | 27.799  | 27.771 | 3.2066 | 0 |
|    |   |   | -3      | 3       | 1        | .057836 |        | 27.831 |   |
|    |   |   | .064463 |         |          | 29.416  | 3.0339 | 0      |   |
| -3 | 4 | 2 | .097272 | .097276 | -.000005 | 36.346  | 36.347 | 2.4698 | 0 |

NUMBER OF OBS. LINES = 17

NUMBER OF CALC. LINES = 17

M(15) = 8 AV.EPS. = .0000383

F 15 = 7.(.015260, 152)

2 LINES ARE UNINDEXED

M-TEST = 8 UNINDEXED IN THE TEST = 1
